# Supplementary material for: An Innovative Telemedical Network to Improve Infectious Disease Management in Critically Ill Patients and Outpatients (TELnet@NRW): Stepped-Wedge Cluster Randomized Controlled Trial
Source: J Med Internet Res. 2022 Mar 2;24(3):e34098. doi: 10.2196/34098 (PMC8928042; doi:10.2196/34098)
Supplement: Multimedia Appendix 4 [file jmir_v24i3e34098_app4.docx]

Multimedia appendix 4, Model structures

Model structure primary data for inpatient care

i = Count variable hospital, p = Count variable patient, j = Count variable group (IG with/without teleconsultation)

Model structure primary data for outpatient care

i = Count variable outpatient physician, p = Count variable patient

Model structure secondary data for outpatient care

i = Count variable outpatient physician, l = Count variable quarter, k = count variable year
